# Supplementary material for: Olive Pomace Extract Contains Low Molecular Weight Peptides and Possesses ACE Inhibitory Activity
Source: MDPI journal article supplement (doi:10.3390/ijms25073962), 2024-04-02
Supplement: s1 [file s1]

**Supplemental data S1.** Endogenous peptides identified in olive pomace using Peaks database (DB) algorithm, filtered by  $-\log P$  score  $>25$  (30 peptides).  $-\log P$  score, statistical significance of the peptide-precursor spectrum match; N, number of amino acids; m/z, precursor mass-to-charge ratio; Mass, peptide mass in Da; RT, retention time; ppm, precursor mass error; Area, peptide abundance shown as area under the curve of the detected peptide; Accession, the accession number of the highest-scoring protein containing this peptide. Oxidised methionine is indicated by a pair of parentheses enclosing the modification mass (+15.99).

| Peptide               | -10lgP | Mass       | N  | ppm   | m/z       | RT    | Accession                              |
|-----------------------|--------|------------|----|-------|-----------|-------|----------------------------------------|
| NSNALACCSA            | 34.52  | 9.523.743  | 10 | 7.1   | 4.771.920 | 51.20 | OE9A062433P1                           |
| GGDNGMNH              | 31.98  | 8.002.872  | 8  | -4.5  | 4.011.449 | 51.36 | OE9A085147P3:OE9A085147P2              |
| RSCQHRY               | 30.05  | 9.484.348  | 7  | 0.4   | 4.752.191 | 21.09 | OE9A113191P1                           |
| ISCHYLF               | 29.46  | 8.814.105  | 7  | 7.4   | 4.417.104 | 33.17 |                                        |
| LSQPCCHSGK            | 29.26  | 10.584.637 | 10 | -11.6 | 5.302.275 | 55.41 |                                        |
| LPPDNSH               | 29.26  | 7.783.610  | 7  | 2.7   | 3.901.841 | 52.42 | OE9A032896P1                           |
| NMHANPSH              | 28.12  | 9.063.766  | 8  | 1.6   | 4.541.908 | 50.91 |                                        |
| RNDASAHCQ             | 27.61  | 10.004.145 | 9  | -8.2  | 5.012.031 | 56.67 |                                        |
| SLIPCCSS              | 27.21  | 8.083.459  | 8  | -6.6  | 8.093.359 | 54.15 | OE9A059381P2:OE9A059381P1:OE9A059381P3 |
| CPASCCAAIS            | 26.84  | 9.243.503  | 10 | -12.8 | 4.631.709 | 43.89 |                                        |
| SGDPTM(+15.99)YE      | 26.79  | 9.143.328  | 8  | -11.8 | 4.581.616 | 50.95 | OE9A048079P1                           |
| GATCPGCGGH            | 26.72  | 8.583.113  | 10 | -14.4 | 4.301.516 | 79.60 |                                        |
| RCPGSHGR              | 26.50  | 8.684.086  | 8  | 1.9   | 4.352.060 | 41.65 |                                        |
| RHCCDRH               | 26.12  | 9.253.759  | 7  | -7.1  | 4.636.872 | 43.55 |                                        |
| PPPAGAAVCG            | 26.03  | 8.384.007  | 10 | -3.7  | 4.201.999 | 43.61 |                                        |
| GSGAPGGGGGGGGIPGA     | 25.89  | 11.815.425 | 17 | -0.1  | 5.917.713 | 70.61 |                                        |
| NSPQHYSN              | 25.79  | 9.453.940  | 8  | 5.8   | 4.737.001 | 30.71 |                                        |
| MAHSGFKG              | 25.55  | 8.333.854  | 8  | -5.9  | 4.176.925 | 33.43 |                                        |
| RGNDTSHV              | 25.51  | 8.844.100  | 8  | -3.3  | 4.432.043 | 31.96 |                                        |
| IDHGCAKH              | 25.50  | 8.794.021  | 8  | -1.2  | 4.407.025 | 42.72 | OE9A062433P1                           |
| IPATDSQG              | 25.47  | 7.873.712  | 8  | 4.6   | 3.946.899 | 36.41 | OE9A083314P2:OE9A083314P3:OE9A083314P1 |
| NSGLGDGY              | 25.46  | 7.813.242  | 8  | 2.4   | 3.916.656 | 35.22 |                                        |
| SNYGGPGPS             | 25.38  | 8.343.508  | 9  | -11.9 | 4.181.716 | 43.33 |                                        |
| TKEICCCM(+15.99)AHGSG | 25.36  | 13.545.138 | 13 | -8.9  | 6.782.499 | 74.39 |                                        |
| SNQACDHPT             | 25.33  | 9.713.767  | 9  | -0.4  | 4.866.896 | 37.06 |                                        |
| MCTAAEM(+15.99)K      | 25.21  | 8.993.551  | 8  | 9.9   | 4.506.838 | 48.32 | OE9A053685P3                           |
| GGGPGGGLGGPS          | 25.13  | 8.684.039  | 12 | 3.6   | 4.352.055 | 45.44 | OE9A068558P1                           |
| QANACHH               | 25.10  | 7.793.133  | 7  | -2.5  | 3.906.582 | 33.30 | OE9A008961P3                           |
| VGDEGMHR              | 25.02  | 8.993.920  | 8  | -0.6  | 4.506.976 | 28.97 |                                        |
| NSCCVCMVR             | 25.00  | 10.133.915 | 9  | -4.6  | 5.076.946 | 42.64 | OE9A009309P1                           |
| total 30 peptides     |        |            |    |       |           |       |                                        |
