# Supplementary material for: Olive Pomace Extract Contains Low Molecular Weight Peptides and Possesses ACE Inhibitory Activity
Source: MDPI journal article supplement (doi:10.3390/ijms25073962), 2024-04-02
Supplement: s1 [file s1]

**Supplemental data S2. Proteins identified as sources of endogenous peptides detected in pomace olive.** Protein -10lgP score, sum of the -10lgP scores of the protein's supporting peptides; Peptides, number of high-confidence supporting peptides; Cover (%), percentage of the protein sequence that is covered by the supporting peptides; Area, protein relative abundance; Protein identification, definitions of best-matched proteins identified by BLAST search (*Olea europaea*); E-value (score), number of expected hits of similar quality that could be found randomly; Protein description, access to protein report.

| Protein accession | -10lgP | Peptides | Cover (%) | Average Mass (Da) | Protein identification (BLAST)                                                                      | Area                   | E-value | % identity | Protein description |
|-------------------|--------|----------|-----------|-------------------|-----------------------------------------------------------------------------------------------------|------------------------|---------|------------|---------------------|
| OE9A062433P1      | 47.27  | 2        | 4         | 111435            | anthocyanidin 3-O-glucosyltransferase                                                               | 3.32 x 10 <sup>7</sup> | 0.0     | 100%       | CAA2981081.1        |
| OE9A008961P3      | 45.24  | 2        | 1         | 816842            | DUF946 domain-containing<br>DUF1162 domain-containing<br>Chorein_N domain-containing                | 3.23 x 10 <sup>5</sup> | 0.0     | 100%       | CAA2957578.1        |
| OE9A051261P1      | 45.01  | 1        | 1         | 263828            | myc box-dependent-interacting 1 isoform X1                                                          | 1.66 x 10 <sup>5</sup> | 0.0     | 100%       | CAA2990894.1        |
| OE9A053685P3      | 43.05  | 1        | 1         | 270051            | white-brown complex homolog 30                                                                      | 4.66 x 10 <sup>5</sup> | 0.0     | 100%       | CAA2969019.1        |
| OE9A085147P3      | 40.15  | 1        | 1         | 218083            | phospholipase D gamma 1-like                                                                        | 1.53 x 10 <sup>6</sup> | 0.0     | 100%       | CAA2951337.1        |
| OE9A032896P1      | 38.50  | 1        | 2         | 97821             | Hypothetical predicted protein                                                                      | 3.26 x 10 <sup>6</sup> |         | 100%       | CAA2978878.1        |
| OE9A087070P3      | 37.75  | 1        | 2         | 101228            | bZIP transcription factor 16-like                                                                   | 1.58 x 10 <sup>6</sup> |         |            | CAA3013064.1        |
| OE9A048079P1      | 35.98  | 1        | 2         | 91628             | tryptophan aminotransferase-related 2 isoform X1                                                    | 2.68 x 10 <sup>5</sup> | 0.0     | 100%       | CAA2969551.1        |
| OE9A059381P1      | 35.55  | 1        | 1         | 173684            | casein kinase 1 HD16                                                                                | 6.69 x 10 <sup>6</sup> | 0.0     | 100%       | CAA2934848.1        |
| OE9A030742P1      | 35.55  | 2        | 3         | 183927            | ATP-dependent DNA helicase DDM1 isoform X1                                                          | 1.46 x 10 <sup>5</sup> |         |            | CAA3021981.1        |
| OE9A009309P1      | 34.37  | 1        | 3         | 73583             | probable E3 ubiquitin- ligase LOG2                                                                  | 1.31 x 10 <sup>6</sup> | 0.0     | 100%       | CAA3023827.1        |
| OE9A068558P1      | 33.70  | 1        | 1         | 200100            | dihydrolipoyllysine-residue succinyltransferase component of 2-oxoglutarate dehydrogenase complex 1 | 3.10 x 10 <sup>6</sup> | 0.0     | 100%       | CAA3014561.1        |
| OE9A083314P1      | 33.29  | 1        | 1         | 186425            | auxin response factor 6 isoform X1                                                                  | 1.42 x 10 <sup>6</sup> |         | 100%       | CAA2976018.1        |
| OE9A030338P1      | 32.94  | 2        | 3         | 162671            | Hypothetical predicted protein                                                                      | 2.94 x 10 <sup>6</sup> |         | 100%       | CAA3033027.1        |
| OE9A079929P2      | 32.04  | 1        | 1         | 248672            | lysine-specific demethylase JMJ18-like                                                              | ND                     |         | 100%       | CAA2934425.1        |
| OE9A057492P1      | 31.15  | 1        | 2         | 108336            | uncharacterized protein LOC111390123                                                                | 2.78 x 10 <sup>7</sup> |         | 100%       | XP_022870890.1      |
| OE9A113191P1      | 30.05  | 1        | 2         | 93640             | putative RING-H2 finger protein ATL21A                                                              | ND                     | 0.0     | 100%       | XP_022855964.1      |
| OE9A038478P1      | 30.04  | 1        | 1         | 163083            | low affinity sulfate transporter 3                                                                  | 8.74 x 10 <sup>4</sup> |         | 100%       | CAA3018940.1        |
